# Supplementary material for: Transcriptomic profiling sheds light on the blue-light and red-light response of oyster mushroom (Pleurotus ostreatus)
Source: AMB Express. 2020 Jan 18;10:10. doi: 10.1186/s13568-020-0951-x (PMC6969877; doi:10.1186/s13568-020-0951-x)
Supplement: Supplementary file 1 — Additional file 1: Table S1. Results and primer sequences of qRT-PCR. PKG, pileus dark treatment; PBG, pileus blue-light treatment. Each treatment comprised three biological replicates. [file 13568_2020_951_MOESM1_ESM.xls]

## Sheet: qPCR
		Q-RT-PCR	Q-RT-PCR	RNAseq	RNAseq
	gene id	Fold change PBG/PKG	P value	Fold change PBG/PKG	P value	Forward primer sequence (5'-3')	Reverse primer sequence (5'-3')
	gene_1057	1.58568	0.0421716	2.00086	0.00745868	GCAACACGGCTACAACACGATT	CTGGCTCACCTGCGGAAGAAT
	gene_258	1.87064	0.151312	2.59083	0.00154312	GAGGAGTCGGAGAAGGAGGTCAT	ACAAGAGCCAAGAGTCAATCGGAAT
	gene_2110	2.16476	0.113731	3.79885	0.000772683	ACCGCTTCGCCTTCTGGATACA	GCTGATGCTCTTGAACACCGTGAA
	gene_1866	5.10331	0.363882	9.55642	0.00978561	CCATTCGCAGGTCGCTCAGTT	CCACTTCCGTATTGCCTGTCCAA
	gene_3613	1.12327	0.268568	2.64464	0.00973013	CTACCATAGACGCCTGTGCTGAC	CGGCTACGATGACATTGGAACCT
	gene_2953	1.71332	0.0366428	1.69064	0.00596236	TCACCGCCAACATCCTCAAGT	CGCCGCAATAGCAGTCCATT
	gene_5831	3.61193	0.132876	14.5789	0.024179	ATGGAAGGATACCGAGATGTAAGTTATACC	AGACAGGAAGGAGGCACGATGAA
	gene_6458	1.68704	0.0740469	4.90129	0.00758817	CGCTATTCTTCGGATTGTCAGGAACT	CGTGATGCTGATGTCGTCGTAGTC
	gene_6211	3.78415	0.000301229	8.71315	0.0143868	CCATCATTCCTCGCATCGCATCC	TGGTACTGTTCGTAGGTTCGTGTTGTA
	gene_10642	0.722855	0.0133464	1.83827	0.00113456	CGCCTGGTACGACAACGAATACG	CGCCGACAACTACAACGCAGATT
	gene_9983	Actin				TTGGACTCTGGCGACGGTGTT	CAGCAAGGTCAAGACGGAGAATAGC
	gene_10642	GPDH				CGCCTGGTACGACAACGAATACG	CGCCGACAACTACAACGCAGATT
