# Supplementary material for: Transcriptomic profiling sheds light on the blue-light and red-light response of oyster mushroom (Pleurotus ostreatus)
Source: AMB Express. 2020 Jan 18;10:10. doi: 10.1186/s13568-020-0951-x (PMC6969877; doi:10.1186/s13568-020-0951-x)
Supplement: Supplementary file 8 — Additional file 8: Table S2. Fold change values and P values of all the expressed genes involved in the pentose phosphate pathway and glycolysis/gluconeogenesis [file 13568_2020_951_MOESM8_ESM.xlsx]

## Sheet: Sheet1
Pentose phosphate pathway		Fold change（Stipe）			P value				Fold change（Pileus）			P value				Fold change（Gill)			P value
Gene ID	iprDesc	Blue/dark	Blue/red	Red/dark	Blue/dark	Blue/red	Red/dark		Blue/dark	Blue/red	Red/dark	Blue/dark	Blue/red	Red/dark		Blue/dark	Blue/red	Red/dark	Blue/dark	Blue/red	Red/dark
gene_1057	Transaldolase AB	1.77154	1.7409	1.0176	0.0262178	0.025817	0.909395		2.00086	3.39931	0.588607	0.00745868	0.00506563	0.0575852		1.01411	1.33337	0.760564	0.630214	0.0503676	0.0601838
gene_11032	Ribose 5-phosphate isomerase	1.14069	1.26926	0.898706	0.567597	0.0579663	0.678542		1.32251	2.10122	0.629402	0.0470869	0.00460561	0.00106295		1.07366	1.5623	0.687231	0.17422	0.00637788	0.00697924
gene_11097	6-phosphogluconate dehydrogenase, 6PGD	1.49155	1.42463	1.04698	0.0769007	0.0547642	0.788178		1.74865	2.98358	0.586091	0.00879607	0.00259239	0.0225513		0.911805	1.10548	0.824806	0.364223	0.634003	0.385906
gene_1170	Bacterial transketolase	1.74963	1.25482	1.39433	0.0359293	0.244909	0.0825524		1.62789	2.26434	0.718926	0.0268178	0.00808835	0.0158209		0.982873	1.2832	0.765954	0.609615	0.010437	0.00645138
gene_11892	SMP-30/Gluconolaconase/LRE-like region	2.34019	2.108	1.11015	0.270676	0.28483	0.757232		1.87621	1.7523	1.07071	0.0462353	0.0357233	0.864316		0.969947	0.788953	1.22941	0.916424	0.661566	0.708891
gene_1245	Alpha-D-phosphohexomutase, alpha/beta/alpha domain I	1.13093	0.870364	1.29937	0.48637	0.419046	0.145496		1.49105	3.21265	0.464117	0.148113	0.00674433	0.0810786		0.970146	1.60896	0.602966	0.767637	0.106171	0.0842816
gene_166	Transaldolase	4.16363	3.21295	1.29589	0.00849365	0.0112405	0.524806		1.91363	1.04912	1.82403	0.0407474	0.908999	0.333106		0.985709	0.912287	1.08048	0.962667	0.781097	0.808944
gene_2953	6-phosphogluconate dehydrogenase, 6PGD	1.78948	1.47419	1.21387	0.0121236	0.0518874	0.283855		1.69064	2.19673	0.769616	0.00596236	0.00334364	0.0511984		0.989893	1.18199	0.83748	0.647284	0.0370159	0.0228906
gene_3128	Phosphoribosyl pyrophosphokinase	0.925084	0.919065	1.00655	0.598667	0.551035	0.953208		1.58096	1.78226	0.887054	0.00905588	0.00403773	0.215379		1.04312	1.09102	0.956093	0.124528	0.0778156	0.275191
gene_3519	Phosphoribosyl pyrophosphokinase	0.794621	1.07863	0.736692	0.476563	0.748389	0.288453		1.59393	2.56505	0.621402	0.0253518	0.00172824	0.0321233		1.0082	1.09483	0.920873	0.861429	0.0161999	0.151872
gene_3613	Ribulose-phosphate 3-epimerase	1.2508	2.24009	0.558369	0.0602867	0.00189096	0.00166898		2.64464	7.57487	0.349133	0.00973013	0.00260146	0.0125801		0.967768	1.2055	0.802797	0.0522989	0.202576	0.143979
gene_4534	Fructose-bisphosphate aldolase, class II, yeast/E. coli subtype	1.68863	1.53693	1.0987	0.0929396	0.121258	0.67711		1.54673	2.12122	0.72917	0.0259085	0.00847957	0.0323538		0.957589	1.29029	0.742149	0.338913	0.0631936	0.0418427
gene_4771	Glucose-6-phosphate dehydrogenase，6PGD	1.50541	1.4893	1.01082	0.0538036	0.106907	0.962222		1.62713	1.87486	0.867868	0.000314145	0.00400144	0.324815		0.858174	1.22771	0.699004	0.211566	0.0068161	0.0335379
gene_6038	Phosphoglucose isomerase (PGI)	2.07068	1.63235	1.26853	0.132723	0.267895	0.57674		1.51314	2.36922	0.638664	0.0908138	0.03068	0.0673801		0.964161	1.2604	0.764964	0.55292	0.113228	0.0861453
gene_7104	Deoxyribose-phosphate aldolase	0.609133	0.956416	0.636891	0.0122741	0.731627	0.00452064		1.60557	2.95736	0.542906	0.00153995	0.00647103	0.0757395		0.866452	1.34023	0.646494	0.15643	0.108176	0.0321424
gene_7364	Alpha-D-phosphohexomutase, alpha/beta/alpha domain I	2.37083	1.95765	1.21106	0.00335622	0.00830947	0.276326		1.96344	3.16765	0.619841	0.0176517	0.00791654	0.0874684		0.922905	1.17297	0.786807	0.0497198	0.192724	0.0768077
gene_833	Inositol phosphatase/fructose-1,6-bisphosphatase	1.36068	1.4739	0.923183	0.0671231	0.0284232	0.529535		2.29887	5.19457	0.442553	0.0124436	0.00281141	0.0214263		0.827512	1.4316	0.578031	0.0628019	0.0555732	0.0038196
gene_8353	Transaldolase AB	1.67791	1.96299	0.854772	0.0168028	0.00955791	0.351473		2.04487	5.23228	0.390818	0.00116509	0.000386082	0.00529578		0.701028	1.15833	0.605206	0.0196578	0.368292	0.020757
gene_9406	#N/A	0.36358	1.13384	0.320662	0.142005	0.71338	0.12187		1.05757	4.64563	0.227647	0.884176	0.0110323	0.08137		1.0339	1.30366	0.793074	0.304507	0.000292516	0.00388157
gene_9804	#N/A	1.08433	0.756011	1.43428	0.330157	0.320267	0.221555		1.13603	1.65982	0.68443	0.442082	0.0422855	0.00205949		1.04043	1.14887	0.905608	0.348492	0.0144092	0.0148269
		Fold change（Stipe）			P value (T test)				Fold change（Pileus）			P value (T test)				Fold change（Gill)			P value (T test)
Glycolysis/ Gluconeogenesis		Blue/dark	Blue/red	Red/dark	Blue/dark	Blue/red	Red/dark		Blue/dark	Blue/red	Red/dark	Blue/dark	Blue/red	Red/dark		Blue/dark	Blue/red	Red/dark	Blue/dark	Blue/red	Red/dark
gene_10616	Glyceraldehyde-3-phosphate dehydrogenase, GAPDH	2.01022	1.60482	1.25262	0.00493744	0.0278213	0.193316		1.7353	3.52872	0.491764	0.00829463	0.00171293	0.00195449		0.9737	1.48662	0.654977	0.499155	0.00481335	0.00509115
gene_10642	Glyceraldehyde-3-phosphate dehydrogenase, GAPDH	1.24078	1.32896	0.933645	0.0031615	0.000679861	0.155138		1.83827	2.18921	0.839698	0.00113456	0.000906781	0.131253		0.856035	1.18796	0.720596	0.00146201	0.187128	0.0325719
gene_10949	Aldehyde dehydrogenase	0.299185	0.969088	0.308729	0.0134461	0.838799	0.0130616		1.31508	5.99977	0.219189	0.274968	0.00187571	0.0230204		0.436857	0.479606	0.910867	0.139941	0.0127146	0.791407
gene_11039	Aldehyde dehydrogenase NAD(P)-dependent	1.58567	1.75458	0.903729	0.00900817	0.0741133	0.756422		1.43173	1.67451	0.855019	0.0132261	0.00375036	0.240446		1.07061	1.17363	0.912227	0.705328	0.411262	0.370528
gene_11147	Triosephosphate isomerase，TIM	1.79266	1.46354	1.22488	0.0010346	0.0159589	0.145972		1.66938	1.82726	0.9136	0.0122755	0.00604215	0.359619		0.940974	1.40125	0.671524	0.0240747	0.00908096	0.00468393
gene_12143	L-lactate/malate dehydrogenase	1.72719	1.13638	1.51991	0.00700214	0.22461	0.00275897		1.9157	2.8953	0.661657	0.000722342	0.000918668	0.047221		0.970181	1.39606	0.69494	0.378988	0.065485	0.045002
gene_12319	Aldehyde/histidinol dehydrogenase	0.980717	0.76768	1.27751	0.901142	0.0363028	0.0762095		1.36535	0.702522	1.9435	0.0332914	0.00387479	0.00270169		1.02205	0.667486	1.53119	0.73679	0.00060738	0.00153909
gene_1232	Phosphoglycerate kinase，PGK	2.1354	1.69408	1.26051	0.00788032	0.0169771	0.168885		1.71714	2.93064	0.585927	0.0270441	0.00621334	0.0349446		0.971539	1.43977	0.674786	0.395322	0.00341263	0.00207824
gene_1245	Alpha-D-phosphohexomutase, alpha/beta/alpha domain I	1.13093	0.870364	1.29937	0.48637	0.419046	0.145496		1.49105	3.21265	0.464117	0.148113	0.00674433	0.0810786		0.970146	1.60896	0.602966	0.767637	0.106171	0.0842816
gene_1482	Single hybrid motif	1.19327	1.0668	1.11856	0.105499	0.578038	0.375732		1.61236	1.9195	0.839989	0.029304	0.0134401	0.397834		0.982375	0.549831	1.78669	0.820172	0.0340491	0.0369765
gene_1907	Aldehyde dehydrogenase NAD(P)-dependent，ADH	5.3934	1.50888	3.57445	0.0171186	0.341473	0.113908		3.85865	3.33552	1.15684	0.00902188	0.0117568	0.485869		1.47162	1.37081	1.07354	0.0554656	0.09982	0.681667
gene_2110	ADH_N	2.51372	4.23657	0.593339	0.0191074	0.00601069	0.238323		3.79885	7.00816	0.542061	0.000772683	0.000260877	0.0386199		1.13253	1.54596	0.732576	0.0922396	0.000193244	0.0126701
gene_2226	Aldehyde dehydrogenase	1.09517	2.01851	0.542562	0.688434	0.00389485	0.0952746		1.07732	1.94189	0.554777	0.544634	0.012864	0.0393067		0.851872	0.806921	1.05571	0.116427	0.0272485	0.402289
gene_2314	GroES-like	1.50612	1.75726	0.857085	0.110505	0.0809918	0.59318		1.80642	3.95578	0.456655	0.012738	0.000551894	0.0708284		1.16022	1.64552	0.705077	0.23647	0.0355339	0.111072
gene_3498	Glycoside hydrolase-type carbohydrate-binding	0.818209	1.05707	0.774034	0.00694835	0.580556	0.0263942		1.38312	1.8154	0.761881	0.000911081	0.00297551	0.0786958		0.9337	0.951284	0.981516	0.109783	0.667466	0.868394
gene_3615	Pyruvate kinase	1.06946	1.04887	1.01964	0.816324	0.808234	0.952421		1.33937	1.47245	0.909623	0.0784309	0.0614103	0.407684		1.01454	1.19121	0.851687	0.899073	0.252618	0.186683
gene_4147	Enolase	1.52701	1.29311	1.18088	0.0101798	0.0480888	0.160285		1.59523	2.30457	0.692205	0.00318085	0.00119879	0.014276		0.9234	1.11971	0.824675	0.193433	0.373253	0.118525
gene_4534	Fructose-bisphosphate aldolase, class II, yeast/E. coli subtype	1.68863	1.53693	1.0987	0.0929396	0.121258	0.67711		1.54673	2.12122	0.72917	0.0259085	0.00847957	0.0323538		0.957589	1.29029	0.742149	0.338913	0.0631936	0.0418427
gene_4743	Hexokinase	1.92811	1.15321	1.67195	0.0264202	0.335282	0.0145918		1.5359	1.41712	1.08382	0.0239436	0.0659011	0.444899		1.07438	1.14709	0.936611	0.319943	0.210118	0.45404
gene_476	Hexokinase	1.46246	1.20371	1.21496	0.00609162	0.150348	0.161804		1.63389	1.78265	0.916551	0.000302046	0.00539102	0.534497		0.925481	0.999439	0.926	0.0622509	0.992797	0.198242
gene_4872	Alcohol dehydrogenase class III/S-(hydroxymethyl)glutathione dehydrogenase	0.263987	0.861845	0.306304	0.146781	0.722417	0.173769		1.5828	2.85327	0.554731	0.016124	0.0069421	0.0913505		0.787333	0.960175	0.81999	0.023303	0.846964	0.338971
gene_5057	Aldehyde dehydrogenase	0.928882	1.05438	0.880973	0.595054	0.863983	0.677167		1.43743	2.50992	0.572699	0.00654375	0.00297363	0.0174141		0.953894	1.11693	0.854034	0.0084613	0.266117	0.132228
gene_5454	Glycoside hydrolase-type carbohydrate-binding	1.7785	1.29251	1.376	0.0294317	0.241119	0.171382		1.35522	1.72635	0.785025	0.0269505	0.007988	0.0342255		1.04825	1.12863	0.92878	0.375821	0.0811982	0.0264377
gene_6038	Phosphoglucose isomerase (PGI)	2.07068	1.63235	1.26853	0.132723	0.267895	0.57674		1.51314	2.36922	0.638664	0.0908138	0.03068	0.0673801		0.964161	1.2604	0.764964	0.55292	0.113228	0.0861453
gene_623	Phosphoglycerate mutase, 2,3-bisphosphoglycerate-independent	1.51211	1.57402	0.960667	0.0455205	0.0447237	0.801199		1.42639	1.59107	0.896493	0.0348281	0.0128839	0.356132		1.00387	1.16245	0.863582	0.927928	0.0154675	0.0505075
gene_6288	Aldehyde dehydrogenase NAD(P)-dependent	3.95225	1.29239	3.05808	0.111622	0.58711	0.0117036		7.30683	2.31174	3.16075	0.0019852	0.0139659	0.0136455		3.60239	2.50791	1.43641	0.00507771	0.0120236	0.0940799
gene_6458	Phosphoenolpyruvate carboxykinase, N-terminal	1.38634	1.93615	0.716032	0.42312	0.164179	0.495806		4.90129	6.85286	0.715218	0.00758817	0.00624059	0.209295		0.72091	0.612347	1.17729	0.251257	0.0860409	0.56572
gene_6459	Phosphoenolpyruvate carboxykinase, N-terminal	0.91429	1.21413	0.753044	0.358117	0.024176	0.0499598		1.58753	1.2495	1.27053	0.0059229	0.115452	0.09031		1.06395	1.00817	1.05533	0.0461808	0.918858	0.539564
gene_6460	Phosphoenolpyruvate carboxykinase, ATP-utilising	1.08182	1.55494	0.69573	0.293915	0.00719636	0.00527253		1.60187	1.27738	1.25403	0.0124319	0.214602	0.319674		1.12224	1.09015	1.02944	0.241129	0.465019	0.754753
gene_7364	Alpha-D-phosphohexomutase, alpha/beta/alpha domain I	2.37083	1.95765	1.21106	0.00335622	0.00830947	0.276326		1.96344	3.16765	0.619841	0.0176517	0.00791654	0.0874684		0.922905	1.17297	0.786807	0.0497198	0.192724	0.0768077
gene_833	Inositol phosphatase/fructose-1,6-bisphosphatase, FBPase	1.36068	1.4739	0.923183	0.0671231	0.0284232	0.529535		2.29887	5.19457	0.442553	0.0124436	0.00281141	0.0214263		0.827512	1.4316	0.578031	0.0628019	0.0555732	0.0038196
gene_8986	Aldo/keto reductase	0.876025	1.88745	0.464132	0.26306	0.00225521	0.00503066		1.26868	1.65799	0.765194	0.00815666	0.00182051	0.00833132		1.0102	1.2262	0.823852	0.696995	0.00238791	0.000920698
gene_9804	PFK	1.08433	0.756011	1.43428	0.330157	0.320267	0.221555		1.13603	1.65982	0.68443	0.442082	0.0422855	0.00205949		1.04043	1.14887	0.905608	0.348492	0.0144092	0.0148269
gene_6458	Phosphoenolpyruvate carboxykinase, PEPCK	1.38634	1.93615	0.716032	0.42312	0.164179	0.495806		4.90129	6.85286	0.715218	0.00758817	0.00624059	0.209295		0.72091	0.612347	1.17729	0.251257	0.0860409	0.56572
gene_6459	Phosphoenolpyruvate carboxykinase, PEPCK	0.91429	1.21413	0.753044	0.358117	0.024176	0.0499598		1.58753	1.2495	1.27053	0.0059229	0.115452	0.09031		1.06395	1.00817	1.05533	0.0461808	0.918858	0.539564
gene_6460	Phosphoenolpyruvate carboxykinase, PEPCK	1.08182	1.55494	0.69573	0.293915	0.00719636	0.00527253		1.60187	1.27738	1.25403	0.0124319	0.214602	0.319674		1.12224	1.09015	1.02944	0.241129	0.465019	0.754753
